# Supplementary material for: Aberrant expression of the candidate tumor suppressor gene DAL-1 due to hypermethylation in gastric cancer
Source: PubMed Central journal article supplement (PMC4770418; doi:10.1038/srep21755), 2016-02-29
Supplement: srep21755-s1.pdf [file srep21755-s1.pdf]

**Aberrant expression of the candidate tumor suppressor gene DAL-1 due to  
hypermethylation in gastric cancer**

**Running title:** DAL-1 deficiency due to hypermethylation in GC

Hao Wang<sup>3,#</sup>, Man Xu<sup>1,#</sup>, Xiaobo Cui<sup>2</sup>, Yixin Liu<sup>4</sup>, Yi Zhang<sup>2</sup>, Yu Sui<sup>2</sup>, Dong Wang<sup>1</sup>, Lei Peng<sup>1</sup>, Dexu Wang<sup>1</sup>, Jingcui Yu<sup>1\*</sup>

<sup>1</sup>Scientific Research Centre, the Second Affiliated Hospital of Harbin Medical University, Harbin 150081, China; <sup>2</sup>Laboratory of Medical Genetics, Harbin Medical University, Harbin 150081, China; <sup>3</sup>Department of Hepatopancreatobiliary Surgery, the Second Affiliated Hospital of Harbin Medical University, Harbin 150081, China; <sup>4</sup>Computer teaching and research section, School of Basic Medical Science, Harbin Medical University.

<sup>#</sup>These authors contributed equally to this work.

\*Corresponding author: Professor Jingcui Yu, Scientific Research Centre, the Second Affiliated Hospital of Harbin Medical University, 246 Xuefu Road, Nangang District, Harbin 150081, China. Phone: +86-451-86605908; email: yujingcui@ems.hrbmu.edu.cn.

**Supplementary Table 1. Relative expression level and methylation status of DAL-1 in GC and adjacent noncancerous gastric tissues**

| Tissue No. | Gender | Age | Grade | Stage | Relative expression level of DAL-1 in RT-PCR assay (intensity scale of gel band) |              | Relative expression level of DAL-1 in IHC assay |              | DAL-1 methylation status |              |              |              |
|------------|--------|-----|-------|-------|----------------------------------------------------------------------------------|--------------|-------------------------------------------------|--------------|--------------------------|--------------|--------------|--------------|
|            |        |     |       |       | Cancerous                                                                        | Noncancerous | Cancerous                                       | Noncancerous | Cancerous                |              | Noncancerous |              |
|            |        |     |       |       |                                                                                  |              |                                                 |              | Methylated               | Unmethylated | Methylated   | Unmethylated |
| 1          | female | 49  | G3    | II    | 0.61                                                                             | 0.18         | 1                                               | 4            | +                        | +            | +            | +            |
| 2          | male   | 50  | G3    | II    | N/A                                                                              | N/A          | 1                                               | 4            | +                        | +            | +            | +            |
| 3          | male   | 54  | G3    | III   | 0.98                                                                             | 0.73         | 0                                               | 4            | +                        | +            | -            | +            |
| 4          | female | 64  | G3    | III   | 0.92                                                                             | 0.99         | 0                                               | 0            | +                        | +            | -            | +            |
| 5          | female | 64  | G2    | II    | 0.34                                                                             | 0.76         | 0                                               | 4            | +                        | +            | +            | +            |
| 6          | male   | 65  | G3    | II    | 1.04                                                                             | 1.20         | 1                                               | 4            | -                        | -            | -            | +            |
| 7          | male   | 54  | G3    | III   | N/A                                                                              | N/A          | 2                                               | 3            | +                        | +            | -            | +            |
| 8          | male   | 54  | G3    | III   | 1.07                                                                             | 0.57         | 1                                               | 1            | +                        | +            | -            | +            |
| 9          | male   | 60  | G3    | III   | N/A                                                                              | N/A          | 0                                               | 4            | +                        | +            | -            | +            |
| 10         | female | 69  | G3    | II    | N/A                                                                              | N/A          | N/A                                             | N/A          | +                        | +            | +            | +            |
| 11         | female | 69  | G3    | III   | N/A                                                                              | N/A          | N/A                                             | N/A          | +                        | +            | +            | +            |
| 12         | male   | 61  | G2    | I     | 0.37                                                                             | 1.04         | N/A                                             | N/A          | +                        | +            | +            | +            |
| 13         | female | 36  | G3    | III   | 0.31                                                                             | 0.00         | 0                                               | 3            | +                        | -            | +            | +            |
| 14         | male   | 58  | G2    | I     | 0.64                                                                             | 1.06         | 1                                               | 3            | +                        | -            | +            | -            |
| 15         | female | 52  | G3    | II    | N/A                                                                              | N/A          | N/A                                             | N/A          | +                        | +            | +            | +            |
| 16         | male   | 49  | G3    | I     | N/A                                                                              | N/A          | 2                                               | 4            | +                        | +            | +            | +            |
| 17         | male   | 76  | G2    | II    | N/A                                                                              | N/A          | 1                                               | 3            | +                        | +            | +            | +            |
| 18         | male   | 34  | G3    | III   | 0.01                                                                             | 0.07         | 0                                               | 4            | +                        | +            | +            | +            |
| 19         | male   | 69  | G1    | II    | N/A                                                                              | N/A          | 0                                               | 4            | +                        | +            | +            | +            |
| 20         | male   | 63  | G1    | II    | 0                                                                                | 0.23         | 0                                               | 3            | +                        | +            | +            | +            |

| Tissue No. | Gender | Age | Grade | Stage | Relative expression level of DAL-1 in RT-PCR assay (intensity scale of gel band) |              | Relative expression level of DAL-1 in IHC assay |              | DAL-1 methylation status |              |              |              |
|------------|--------|-----|-------|-------|----------------------------------------------------------------------------------|--------------|-------------------------------------------------|--------------|--------------------------|--------------|--------------|--------------|
|            |        |     |       |       | Cancerous                                                                        | Noncancerous | Cancerous                                       | Noncancerous | Cancerous                |              | Noncancerous |              |
|            |        |     |       |       |                                                                                  |              |                                                 |              | Methylated               | Unmethylated | Methylated   | Unmethylated |
| 21         | female | 52  | G3    | III   | 2.05                                                                             | 0.76         | 0                                               | 3            | +                        | +            | +            | +            |
| 22         | male   | 71  | G3    | II    | N/A                                                                              | N/A          | 0                                               | 2            | -                        | +            | -            | +            |
| 23         | male   | 55  | G3    | II    | N/A                                                                              | N/A          | N/A                                             | N/A          | +                        | +            | +            | +            |
| 24         | female | 65  | G2    | II    | 0.85                                                                             | 1.13         | N/A                                             | N/A          | +                        | +            | +            | +            |
| 25         | male   | 70  | G3    | III   | 0.97                                                                             | 0.56         | 0                                               | 3            | +                        | +            | +            | -            |
| 26         | male   | 71  | G3    | II    | 0.43                                                                             | 0.99         | 0                                               | 3            | +                        | +            | +            | -            |
| 27         | female | 56  | G3    | I     | 0.36                                                                             | 0.69         | 0                                               | 4            | +                        | +            | -            | +            |
| 28         | male   | 81  | G3    | III   | N/A                                                                              | N/A          | N/A                                             | N/A          | +                        | +            | -            | +            |
| 29         | male   | 76  | G3    | III   | N/A                                                                              | N/A          | N/A                                             | N/A          | +                        | +            | -            | +            |
| 30         | female | 48  | G1    | I     | N/A                                                                              | N/A          | N/A                                             | N/A          | +                        | -            | +            | +            |
| 31         | male   | 60  | G2    | II    | 0.57                                                                             | 0.72         | N/A                                             | N/A          | +                        | +            | +            | +            |
| 32         | male   | 68  | G3    | III   | N/A                                                                              | N/A          | N/A                                             | N/A          | +                        | +            | +            | +            |
| 33         | female | 37  | G2    | III   | N/A                                                                              | N/A          | N/A                                             | N/A          | +                        | -            | +            | +            |
| 34         | male   | 58  | G2    | I     | N/A                                                                              | N/A          | N/A                                             | N/A          | +                        | +            | +            | +            |
| 35         | male   | 63  | G3    | III   | 0.67                                                                             | 0.94         | N/A                                             | N/A          | +                        | +            | +            | +            |
| 36         | male   | 64  | G3    | III   | N/A                                                                              | N/A          | N/A                                             | N/A          | +                        | +            | -            | +            |
| 37         | female | 62  | G3    | III   | 0.88                                                                             | 1.49         | N/A                                             | N/A          | +                        | +            | +            | +            |
| 38         | female | 35  | G3    | III   | N/A                                                                              | N/A          | 0                                               | 4            | N/A                      | N/A          | N/A          | N/A          |

**Supplementary Table 2 Statistical analysis for IHC analysis of DAL-1 expression in tissues**

| Rank | GC tissues | Adjacent noncancerous gastric tissue | <i>P-value</i> |
|------|------------|--------------------------------------|----------------|
| 0    | 14         | 1                                    |                |
| 1    | 6          | 1                                    |                |
| 2    | 2          | 1                                    | <0.0001***     |
| 3    | 0          | 8                                    |                |
| 4    | 0          | 11                                   |                |

\*\*\* $P < 0.001$ , according to Kruskal-Wallis Test

**Supplementary Table 3 Statistical analysis for DAL-1 methylation status in tissues**

| Group                                | DAL-1 methylation status |                     | <i>P-value</i> |
|--------------------------------------|--------------------------|---------------------|----------------|
|                                      | Methylated (n=37)        | Unmethylated (n=37) |                |
| GC tissues                           | 35                       | 2                   |                |
| Adjacent noncancerous gastric tissue | 26                       | 11                  | 0.0060**       |

\*\* $P < 0.01$ , according to Fisher's exact test

# Supplementary Figure 1

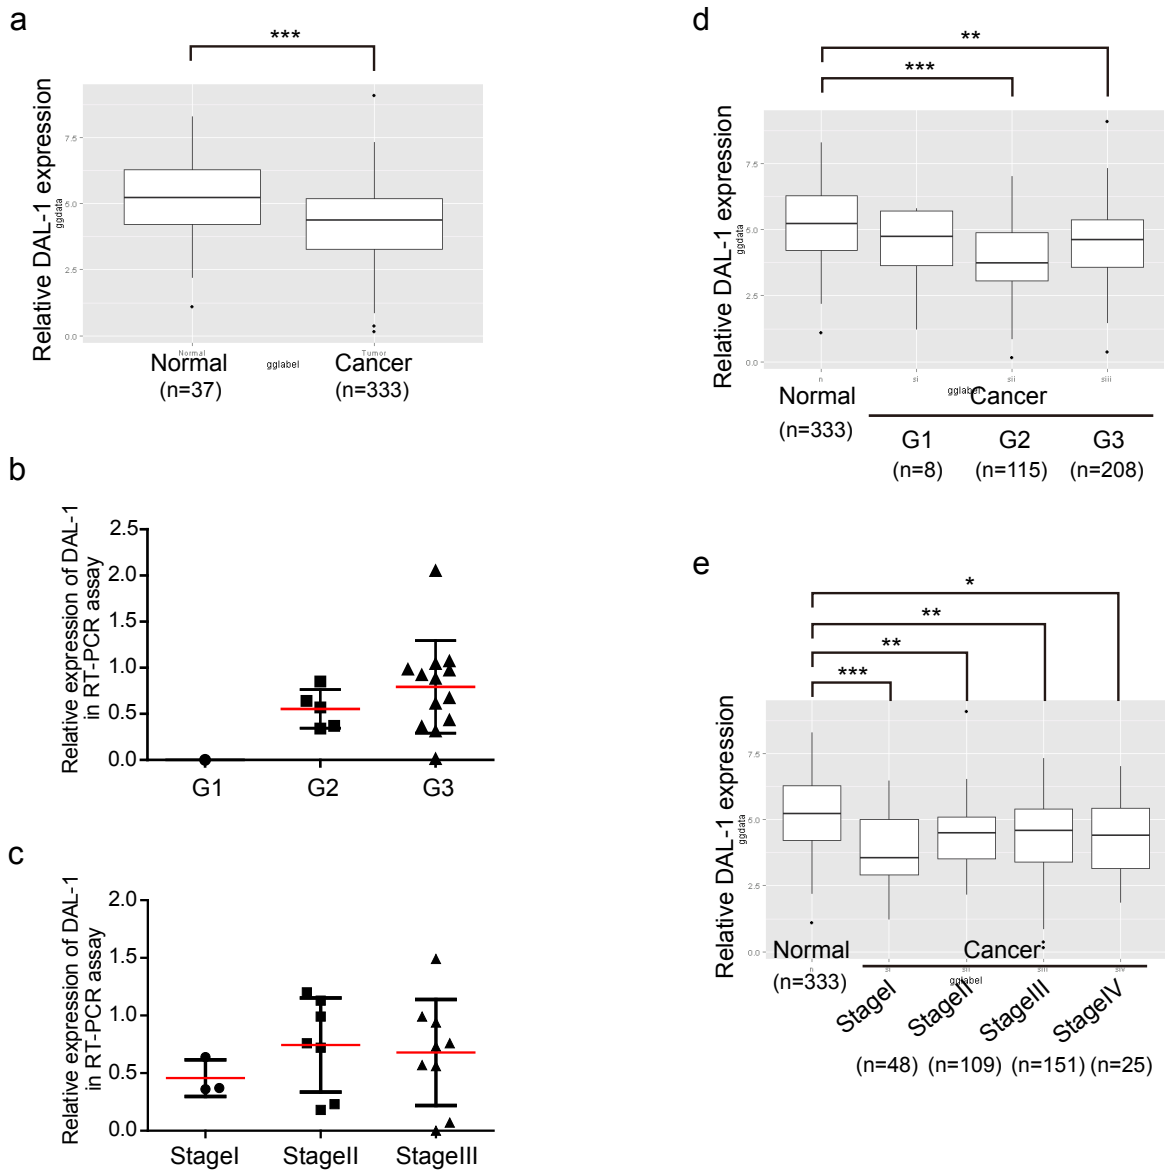

## Supplementary Figure Legends

**Figure 1. Decreased expression of DAL-1 in gastric cancers (GCs).** (a) The expression levels of DAL-1 in GCs and the matched normal gastric samples in The Cancer Genome Atlas (TCGA) datasets. \*\*\* $P < 0.001$ , with *t*-test analysis. (b) and (c) The expression levels of DAL-1 in different grade or stage GCs of our own primary samples. The data are described as mean  $\pm$  standard derivation (SD). (d) and (e) The expression levels of DAL-1 in normal gastric tissues and the different grade or stage GCs in TCGA datasets. \*\* $P < 0.01$ , \*\*\* $P < 0.001$ , by ANOVA and Dunnett's multiple comparison post-test.
